# Supplementary material for: Spatial and Temporal Variation of Droughts in the Mongolian Plateau during 1959–2018 Based on the Gridded Self-Calibrating Palmer Drought Severity Index
Source: MDPI journal article supplement (doi:10.3390/w14020230), 2022-01-13
Supplement: s1 [file s1]

Archive with 1 entries (1 files):
- water-1436987-supplementary.pdf
