# Supplementary material for: Spatial and Temporal Variation of Droughts in the Mongolian Plateau during 1959–2018 Based on the Gridded Self-Calibrating Palmer Drought Severity Index
Source: MDPI journal article supplement (doi:10.3390/w14020230), 2022-01-13
Supplement: s1 [file s1 › water-1436987-supplementary.pdf]

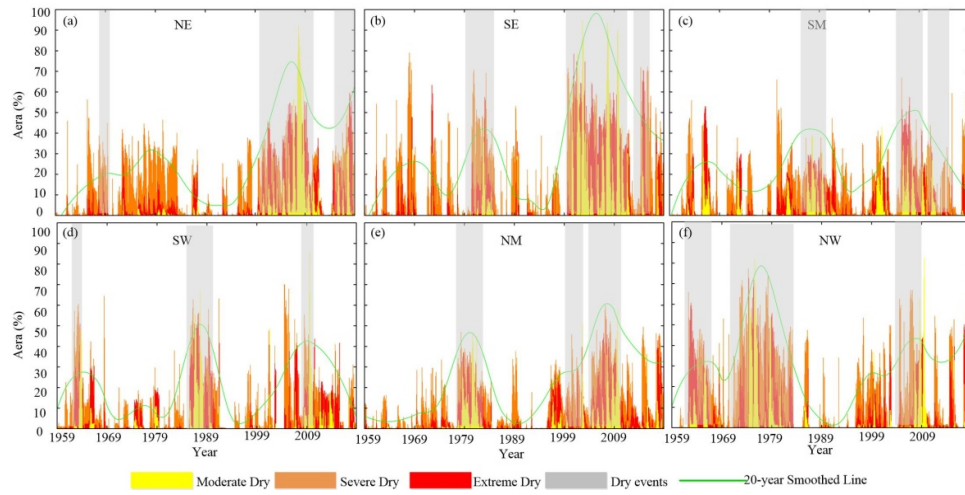

**Figure S1.** History area evolution of drought events at different drought ranks from 1959 to 2018. The green line means the 20-year smoothed line based on the LOESS.

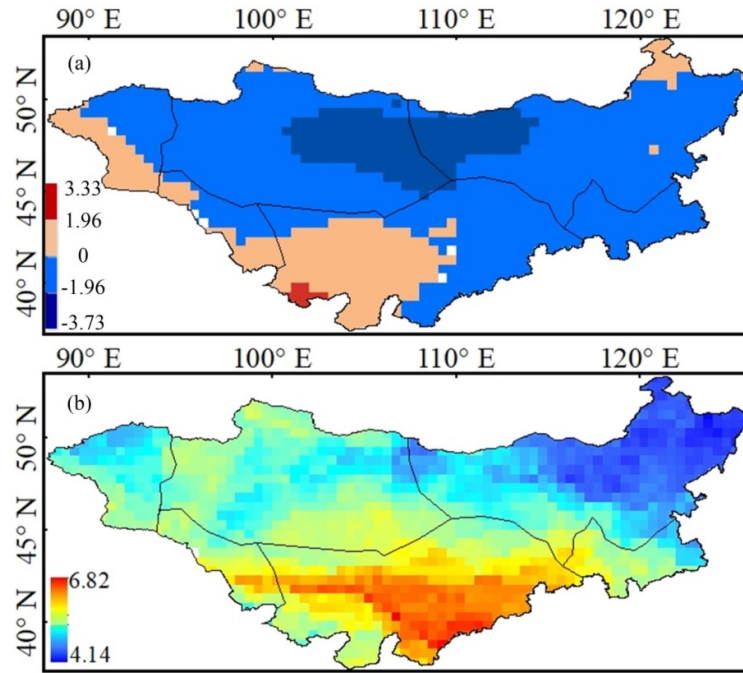

**Figure S2.** The MK significant values at a 0.05 significance threshold in annual precipitation (a) and annual mean temperature (b) over Mongolian Plateau during 1959–2018.

**Table S1.** Teleconnection indices used in this study with their full name, time period and source.

| Indices | Full Name                        | Time Period | Source                                                                                                                                                                       |
|---------|----------------------------------|-------------|------------------------------------------------------------------------------------------------------------------------------------------------------------------------------|
| NAO     | North Atlantic Oscillation Index | 1959-2018   | NOAA Climate Prediction Center<br><a href="http://www.cpc.ncep.noaa.gov/data/teledoc/nao.shtml">http://www.cpc.ncep.noaa.gov/data/teledoc/nao.shtml</a>                      |
| AO      | Arctic Oscillation               | 1959-2018   | NOAA Earth System Research Laboratory<br><a href="https://www.esrl.noaa.gov/psd/gcos_wgsp/Timeseries/AO/">https://www.esrl.noaa.gov/psd/gcos_wgsp/Timeseries/AO/</a>         |
| PDO     | Pacific Decadal Oscillation      | 1959-2018   | OAA Earth System Research Laboratory<br><a href="https://www.esrl.noaa.gov/psd/gcos_wgsp/Timeseries/PDO/">https://www.esrl.noaa.gov/psd/gcos_wgsp/Timeseries/PDO/</a>        |
| NINO34  | NINO3.4 SST Index                | 1959-2018   | NOAA Earth System Research Laboratory<br><a href="https://www.esrl.noaa.gov/psd/gcos_wgsp/Timeseries/Nino34/">https://www.esrl.noaa.gov/psd/gcos_wgsp/Timeseries/Nino34/</a> |

**Table S2.** Variance contributions of the un-rotated and rotated components based on monthly scPDSI.

|            | Component      | PC1   | PC2   | PC3   | PC4   | PC5   | PC6   |
|------------|----------------|-------|-------|-------|-------|-------|-------|
| Un-rotated | Variance (%)   | 29.64 | 15.17 | 8.67  | 7.40  | 5.21  | 3.99  |
|            | Cumulative (%) | 29.64 | 44.81 | 53.48 | 60.88 | 66.09 | 70.08 |
| Rotated    | Variance (%)   | 28.45 | 15.91 | 8.55  | 7.61  | 5.42  | 4.17  |
|            | Cumulative (%) | 28.45 | 44.36 | 52.91 | 60.52 | 65.94 | 70.11 |

**Table S3.** Drought trend based on MK and Sen's slope.

| scPDSI value                   | Category        |
|--------------------------------|-----------------|
| $B < 0$ and $ Z  > 1.96$       | Significant dry |
| $B < 0$ and $ Z  \leq 1.96$    | Slight dry      |
| $B \geq 0$ and $ Z  \leq 1.96$ | Slight wet      |
| $B > 0$ and $ Z  > 1.96$       | Significant wet |

$\beta$  is the Sen's slope estimator and  $Z$  is the significant value of MK test.
